# Supplementary material for: SnS2/polypyrrole for high-efficiency photocatalytic oxidation of benzylamine
Source: Royal Society of Chemistry journal article supplement (doi:10.1039/d2dt01899c), 2022-01-01
Supplement: d2dt01899c1.pdf [file d2dt01899c1.pdf]

**Supporting information for:**

**SnS<sub>2</sub>/polypyrrole for high-efficiency photocatalytic oxidation of  
benzylamine**

Zhuizhui Su,<sup>a,b</sup> Bingxing Zhang,<sup>a,b</sup> Xiuyan Cheng,<sup>a,b</sup> Mingzhao Xu,<sup>a,b</sup> Gang Chen,<sup>a,b</sup>  
Yufei Sha,<sup>a,b</sup> Yanyue Wang,<sup>a,b</sup> Jingyang Hu,<sup>a,b</sup> Ran Duan<sup>c</sup> and Jianling Zhang<sup>\*a,b</sup>

E-mail: zhangjl@iccas.ac.cn

## 1. Experimental Section

**Materials.**  $\text{SnCl}_4 \cdot 5\text{H}_2\text{O}$  (A. R. grade) was supplied by China National Medicines Co., Ltd. Thioacetamide (TAA, 99% purity), pyrrole (99% purity), methyl orange (MO),  $\text{FeCl}_3 \cdot 6\text{H}_2\text{O}$  (98.5% purity), 3,3',5,5'-tetramethylbenzidine (TMB), 2,2,6,6-tetramethylpiperidine (TEMP), 5,5-dimethyl-1-pyrroline *N*-oxide (DMPO), sodium acetate trihydrate ( $\text{NaAc} \cdot 3\text{H}_2\text{O}$ , 99% purity) and amines were purchased from Beijing InnoChem Science & Technology Co., Ltd. Ethanol (A. R. grade), acetic acid (HAc, A. R. grade) and *N,N*-dimethylformamide (DMF, A.R. grade) were purchased from Beijing Chemical Works. Deionized water was provided by Beijing Analysis Instrument Factory. Nafion D-521 dispersion (5% w/w in water and 1-propanol,  $\geq 0.92$  meq/g exchange capacity) was purchased from Alfa Aesar China Co., Ltd.  $\text{N}_2$  (purity 99.9%) was supplied by Beijing Analysis Instrument Factory.

**Synthesis of  $\text{SnS}_2$ .** The  $\text{SnS}_2$  nanoplates were prepared in a hydrothermal kettle by hydrothermal method.<sup>1</sup> In a typical experiment,  $\text{SnCl}_4 \cdot 5\text{H}_2\text{O}$  (131 mg) and TAA (22.5 mg) were dispersed in deionized water (60 mL). After stirring for 1 h at 25 °C, the mixture was transferred to a hydrothermal kettle, and then reacted at 160 °C for 12 h. After the reaction was completed, the obtained suspension was cleaned three times with deionized water and ethanol, respectively. Afterward, the  $\text{SnS}_2$  was prepared by drying in under vacuum at 80 °C for 16 h.

**Synthesis of PPy nanotubes.** PPy nanotubes were prepared by a chemical polymerization.<sup>2</sup> Briefly, MO (82 mg) and  $\text{FeCl}_3 \cdot 6\text{H}_2\text{O}$  (675 mg) were dissolved into 40 mL and 10 mL of water, respectively. Then 10 mL of  $\text{FeCl}_3$  solution and 175  $\mu\text{L}$  of pyrrole were slowly dropped to 40 mL of MO solution. After stirring vigorously at 25 °C for a day and night of reaction, the as-prepared product was filtered and washed with water and dried under vacuum at 80 °C for 24 h.

**Synthesis of  $\text{SnS}_2$ /PPy.** Firstly, PPy (60 mg) and water (30 mL) were put into a beaker, and then sonicate for 1 h and stir for 12 h. Then,  $\text{SnCl}_4 \cdot 5\text{H}_2\text{O}$  (131.0 mg), TAA (22.5 mg) and a certain amount of PPy-dispersed aqueous solution were dispersed in water

(60 mL). After stirring for 1 h at 25 °C, the mixture was transferred to a hydrothermal kettle, and then reacted at 160 °C for 12 h. After the reaction was completed, the obtained suspension was cleaned three times with deionized water and ethanol, respectively. Afterward, the product was prepared by drying in under vacuum at 80 °C for 16 h.

**Material characterizations.** The morphologies were performed by SEM (HITACHI S-4800), TEM (JEM-1011) and HRTEM (JEM-2100F). XRD patterns were detected on a Rigaku D/max-2500 diffractometer (Cu K $\alpha$  radiation,  $\lambda = 1.5418 \text{ \AA}$ , 40 kV, 200 mA and  $5^\circ \text{ min}^{-1}$ ). AFM was characterized on Nanoscope V Multimode 8. The N<sub>2</sub> adsorption-desorption isotherms were gained from a Micromeritics ASAP 2020M system. The elemental content of Sn in SnS<sub>2</sub>/PPy was confirmed by ICP-AES. XPS was recorded with a multipurpose X-ray photoemission spectroscope (Thermo Scientific ESCALAB 250Xi). The UV-Vis DRS spectra were characterized by spectrophotometer (V-2600, SHIMADZU). The transient state PL spectroscopy and steady-state PL spectra were obtained by a FLS980 fluorescence spectrophotometer (the excitation wavelength of 305 nm) and a FluoroMax+ fluorescence spectrophotometer (the excitation wavelength of 334 nm), respectively. ESR spectra were collected on Bruker ELEXSYS II E500.

**Photocatalytic oxidation of benzyl amine.** Typically, a mixture of amine (0.1 mmol), photocatalyst (10 mg) and DMF (5 mL) was dispersed in a 50 mL flask. Before irradiation, the suspension was stirred in air and dark for 1 h to ensure the complete adsorption-desorption equilibrium. Finally, the reaction was carried out at 25 °C with a 300 W Xe lamp as the simulated light source ( $500 \text{ mW cm}^{-2}$ ). After irradiation, the heterogeneous mixture was centrifuged at 12000 rpm for 5 min. The liquid phase was detected by <sup>1</sup>H NMR method (Bruker Avance III 400 HD).

**Molecular oxygen activation ability measurement.** The mixture of 2 mg catalyst and 10 mL TMB solution (0.5 mM, HAc/NaAc buffer solution) was illuminated by a 300 W Xe lamp ( $380 < \lambda < 780 \text{ nm}$ ). The oxidation of TMB was determined by a UV-Vis absorption spectrum at different time.

**In-situ ESR experiment.** 5 mg of catalyst and 5 mL of DMF were added to a flask,

and the mixture was stirred in air for 1 h. The suspension was mixed with 60  $\mu\text{L}$  trapping agent of TEMP or DMPO in a flask. Then the mixture was light-illuminated (300 W Xe lamp,  $380 < \lambda < 780$  nm) for different time at room temperature and analyzed by Bruker ELEXSYS II E500.

**EIS measurement.** The EIS test was performed on a three-electrode system (photocatalyst-coated indium-tin oxide as the working electrode, an Ag/AgCl with 3.5 M KCl as a reference electrode and 1  $\text{cm}^2$  Pt net as the counter electrode) at a CHI660E electrochemical workstation (Chenhua Instrument, Shanghai, China). A 0.5 M  $\text{Na}_2\text{SO}_4$  solution was used as electrolyte ( $\text{pH} = 6.8$ ). To prepare the catalyst ink, the photocatalyst (5 mg) and 5 % Nafion 117 solution as conducting binder (15  $\mu\text{L}$ ) were added into ethanol (250  $\mu\text{L}$ ) and sonicated for 2 h. Then the catalyst ink was dropped on the surface of an indium-tin oxide (ITO) plate (1  $\text{cm}^2$ ) to prepare the working electrodes.

## 2. Results and Discussion

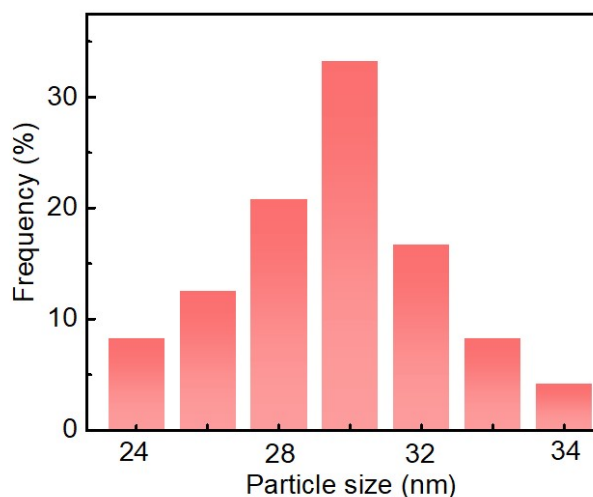

**Fig. S1.** Particle size distribution of SnS<sub>2</sub> nanoplates.

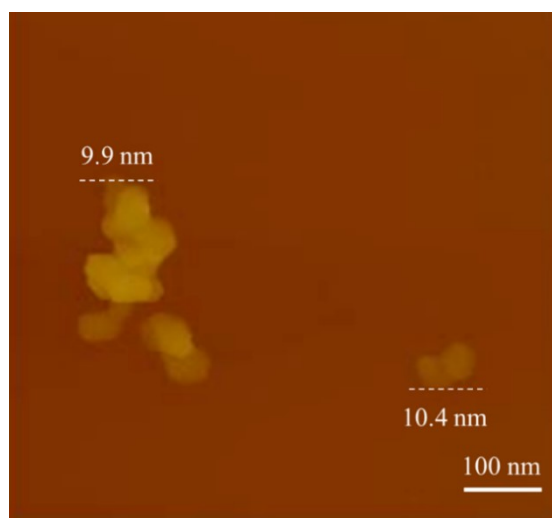

**Fig. S2.** AFM image of SnS<sub>2</sub> nanoplates.

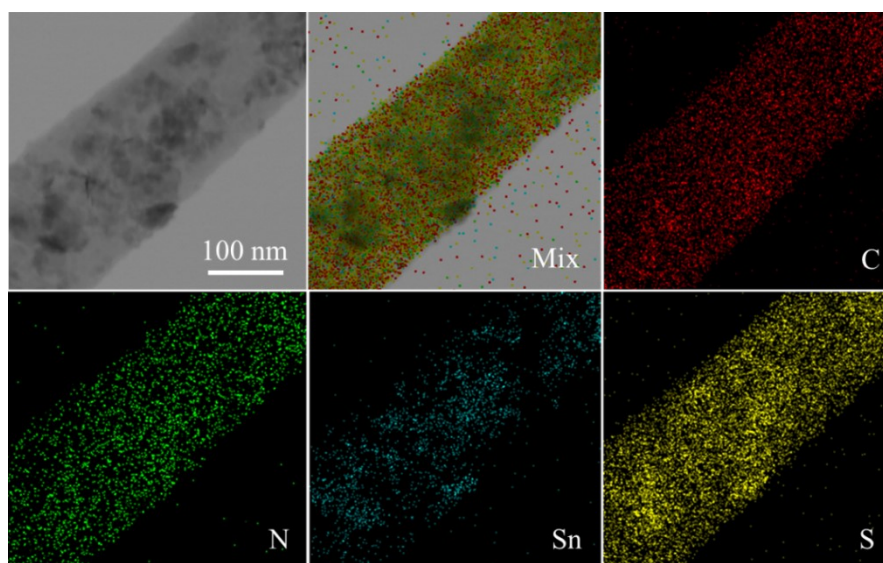

**Fig. S3.** EDS elemental mappings of SnS<sub>2</sub>/PPy.

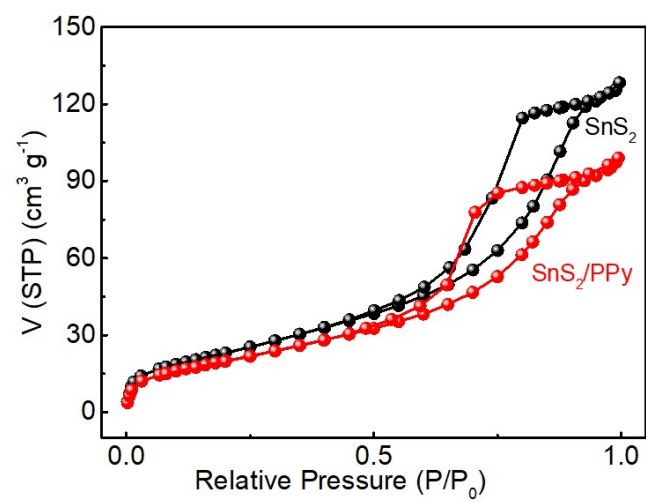

**Fig. S4.** N<sub>2</sub> adsorption-desorption isotherms of SnS<sub>2</sub>/PPy and SnS<sub>2</sub>.

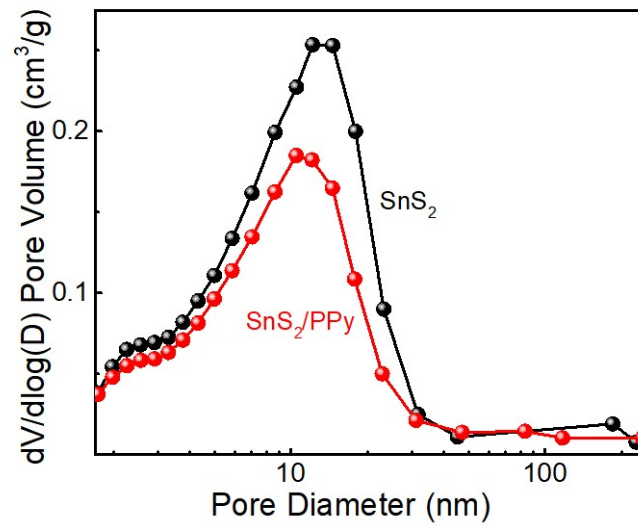

**Fig. S5.** Pore size distributions based on the Barrett-Joyner-Halenda (BJH) method of SnS<sub>2</sub>/PPy and SnS<sub>2</sub>.



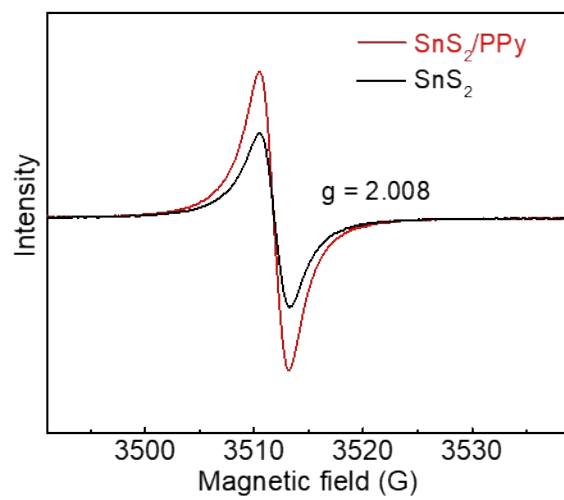

**Fig. S6.** ESR spectra of SnS<sub>2</sub>/PPy and SnS<sub>2</sub>.

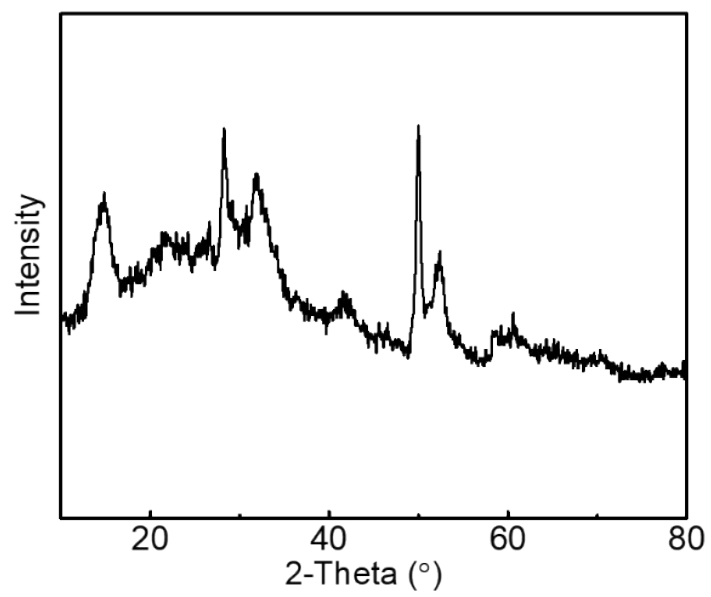

**Fig. S7.** XRD pattern of the SnS<sub>2</sub>/PPy after used for five cycles.

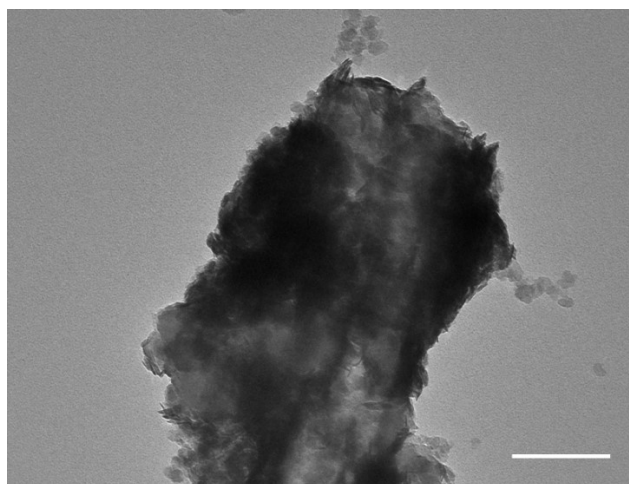

**Fig. S8.** TEM image of the SnS<sub>2</sub>/PPy after used for five cycles. Scale bar: 200 nm

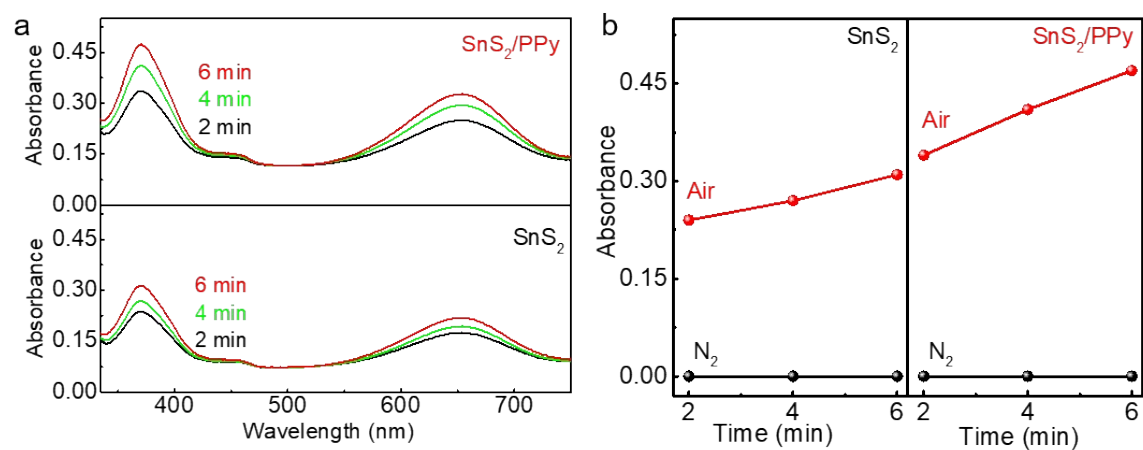

**Fig. S9.** (a) Time-dependent UV-Vis absorption spectra of TMB oxidation with SnS<sub>2</sub>/PPy and SnS<sub>2</sub> in air. (b) The absorbance peak monitored for the product with a prolonged illumination time of SnS<sub>2</sub>/PPy and SnS<sub>2</sub> in N<sub>2</sub> and air.

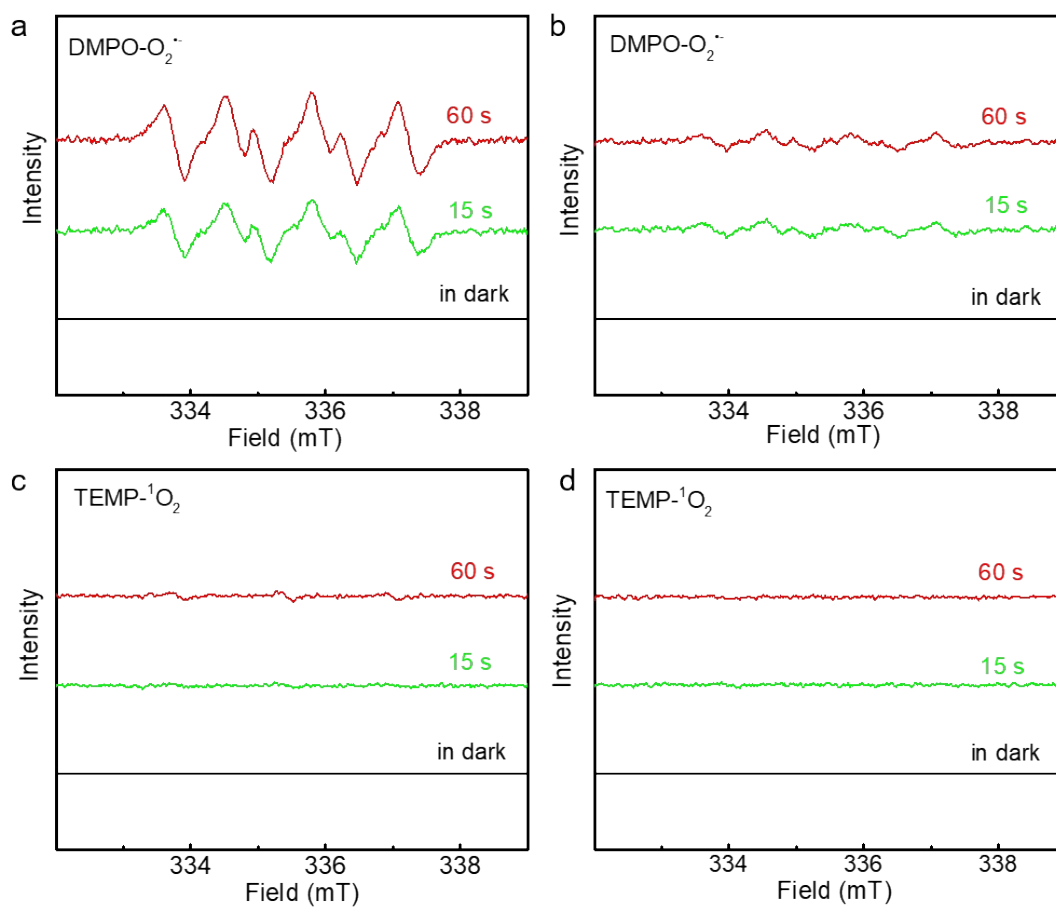

**Fig. S10.** *In-situ* ESR spectra of SnS<sub>2</sub>/PPy (a) and SnS<sub>2</sub> (b) in the presence of DMPO. *In-situ* ESR spectra of SnS<sub>2</sub>/PPy (c) and SnS<sub>2</sub> (d) in the presence of TEMP.

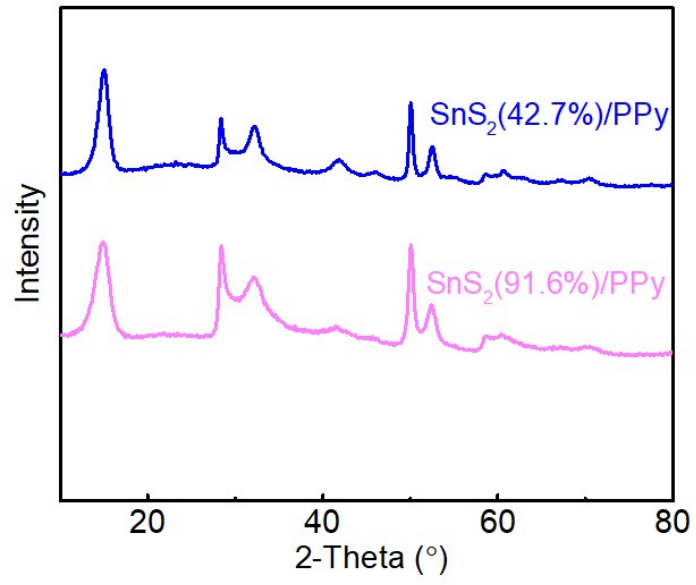

**Fig. S11.** XRD patterns of SnS<sub>2</sub>/PPy with different SnS<sub>2</sub> contents.

**Table S1.** Sn and SnS<sub>2</sub> contents in different SnS<sub>2</sub>/PPy samples determined by ICP-AES method.

| Sample | Sn content | SnS <sub>2</sub> content |
|--------|------------|--------------------------|
| 1      | 50.85%     | 78.2%                    |
| 2      | 27.74%     | 42.7%                    |
| 3      | 59.57%     | 91.6%                    |

**Table S2.** Catalytic activities of various photocatalysts in the photocatalytic oxidation of benzylamine.

| Photocatalyst                      | Conditions                                                                               | Conversion (%) | Selectivity (%) | TOF ( $\mu\text{mol g}^{-1} \text{h}^{-1}$ ) | Reference |
|------------------------------------|------------------------------------------------------------------------------------------|----------------|-----------------|----------------------------------------------|-----------|
| SnS <sub>2</sub> /PPy              | benzylamine (0.1 mmol), catalyst (10 mg), air, 300 W Xe lamp                             | 99.7           | >99             | 823                                          | This work |
| BiOBr-S-110                        | benzylamine (0.1 mmol), catalyst (100 mg), O <sub>2</sub> , 5 W fluorescent lamp         | 100            | 100             | 35.7                                         | 11        |
| TiO <sub>2</sub>                   | benzylamine (0.1 mmol), catalyst (10 mg), air, 100 W Hg lamp (cut-off below 300 nm)      | 99             | 85              | 468                                          | 12        |
| Nb <sub>2</sub> O <sub>5</sub>     | benzylamine (5 mmol), catalyst (100 mg), O <sub>2</sub> , 500 W Hg lamp (>300 nm)        | >99            | 97              | 480                                          | 13        |
| <i>m</i> -NH <sub>2</sub> -MIL-125 | amine (0.2 mmol), catalyst (10 mg), air, 25 °C, 4 mL MeCN, 300 W Xe lamp                 | 62.8           | 92.6            | 475                                          | 34        |
| NH <sub>2</sub> -UiO-66            | benzylamine (0.1 mmol), catalyst (15 mg), air, RT, 3 mL MeCN, 300 W Xe lamp              | 83             | 99              | 274                                          | 35        |
| Au-Pd@ZrO <sub>2</sub>             | benzylamine (1 mmol), catalyst (50 mg), 1 atm O <sub>2</sub> , 500 W Hg lamp (400-750nm) | -              | 96              | 47                                           | 36        |
| Ag/AgI/titanate                    | benzylamine (0.5 mmol), catalyst (50 mg), O <sub>2</sub> , 500 W Hg lamp                 | 95             | 96              | 190                                          | 14        |
| Pd <sub>0.5</sub> /NS-OV           | amine (0.2 mmol), catalyst (10 mg), air, 1.5 mL MeCN, 300 W Xe lamp                      | 95.1           | 98.2            | 778                                          | 37        |



## References

- [1] Z. Z. Su, B. X. Zhang, J. B. Shi, D. X. Tan, F. Y. Zhang, L. F. Liu, X. N. Tan, D. Shao, G. Y. Yang and J. L. Zhang, *Sustainable Energy & Fuels*, 2019, **3**, 1233-1238.
- [2] C. C. Shen, Y. N. Liu, X. Wang, X. X. Fang, Z. W. Zhao, N. Jiang, L. B. Ma, X. Zhou, T. Y. Cheang and A. W. Xu, *Dalton Trans.*, 2018, **47**, 11705-11712.
